# Supplementary material for: Thalidomide combined with transcatheter artierial chemoembolzation for primary hepatocellular carcinoma: a systematic review and meta-analysis
Source: PubMed Central journal article supplement (PMC5546534; doi:10.18632/oncotarget.16689), 2017-03-29
Supplement: oncotarget-08-44976-s001.pdf [file oncotarget-08-44976-s001.pdf]

# Thalidomide combined with transcatheter arterial chemoembolization for primary hepatocellular carcinoma: a systematic review and meta-analysis

## Supplementary Material

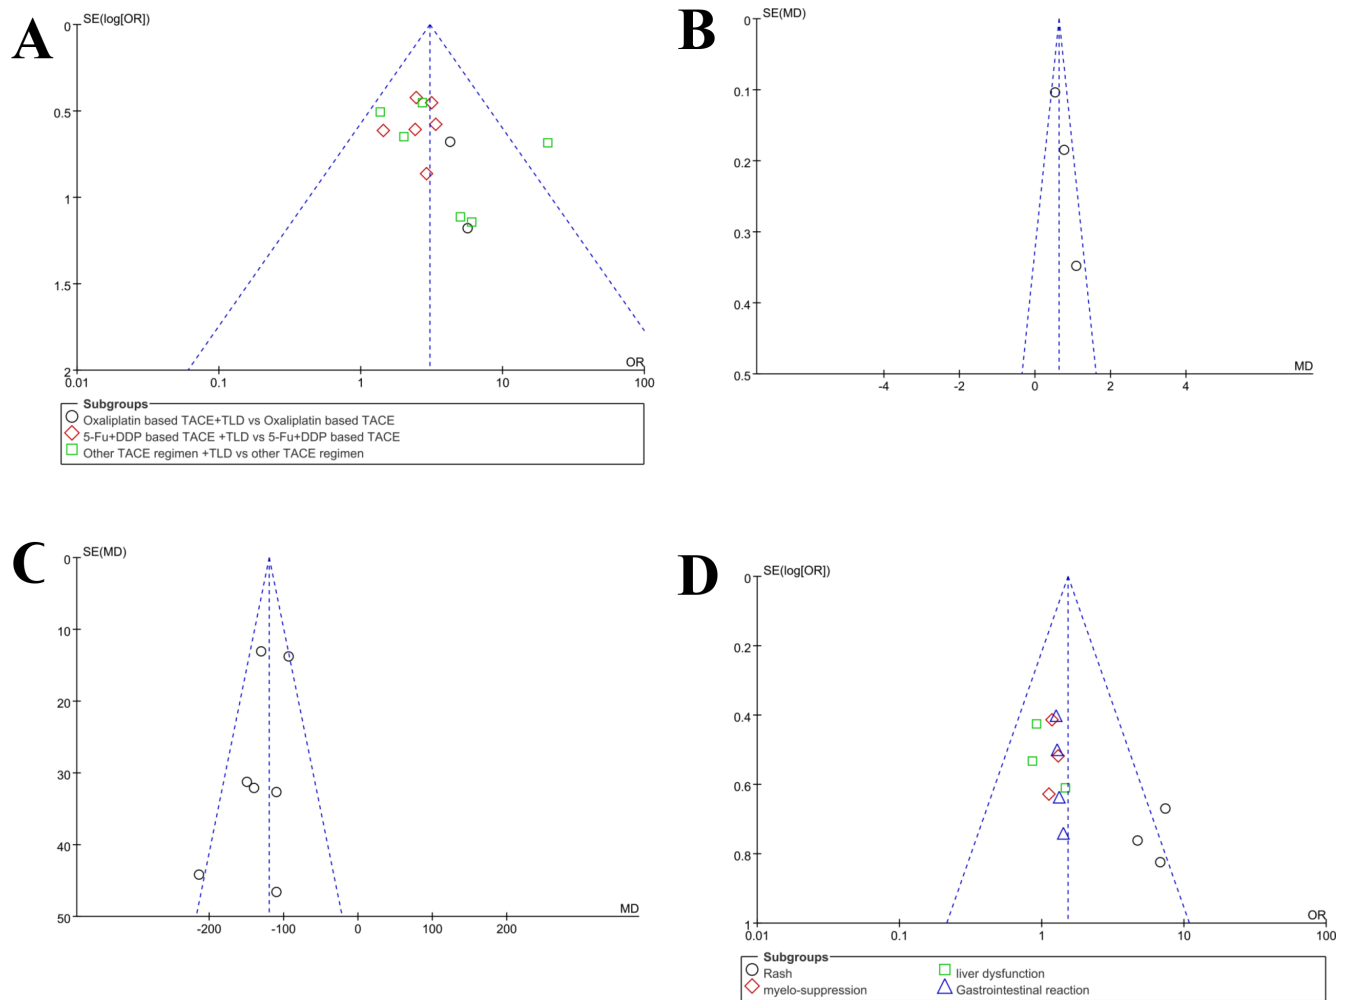

Supplementary Figure 1: Funnel plot for publication bias(A, DCR; B, CD4/CD8; C, VEGF; D, adverse events)
